# Supplementary material for: Increased O-GlcNAcylation promotes IGF-1 receptor/PhosphatidyI Inositol-3 kinase/Akt pathway in cervical cancer cells
Source: PubMed Central journal article supplement (PMC8927345; doi:10.1038/s41598-022-08445-0), 2022-03-16

## Supplementary Information

### Increased O-GlcNAcylation promotes IGF-1 Receptor/Phosphatidylinositol-3 kinase/Akt pathway in cervical cancer cells

Victoria Jiménez-Castillo<sup>1,2</sup>, Daniela Illescas-Barbosa<sup>2</sup>, Edgar Zenteno<sup>3</sup>, Beatriz Xóchitl Ávila-Curiel<sup>2</sup>, María Cristina Castañeda-Patlán<sup>3</sup>, Martha Robles-Flores<sup>3</sup>, Daniel Montante-Montes De Oca<sup>4</sup>, Eduardo Pérez-Campos<sup>1</sup>, Anayetzin Torres-Rivera<sup>6</sup>, Abdelouhab Bouaboud<sup>5</sup>, Patrick Pagesy<sup>5</sup>, Carlos Josué Solórzano-Mata<sup>2\*</sup>, Tarik Issad<sup>5\*</sup>.

<sup>1</sup> *National Technology of Mexico/IT.Oaxaca, Mexico*

<sup>2</sup> *Faculty of Medicine and Surgery/Faculty of Dentistry, Universidad Autónoma Benito Juárez de Oaxaca, Oaxaca, México*

<sup>3</sup> *Departamento de Bioquímica, Facultad de Medicina, Universidad Nacional Autónoma de México (UNAM), Mexico City, Mexico.*

<sup>4</sup> *Instituto Nacional de Ciencias Médicas y Nutrición Salvador Zubirán, Mexico city, Mexico*

<sup>5</sup> *Université Paris Cité, Institut Cochin, CNRS, INSERM, F-75014 Paris, France*

<sup>6</sup> *Tecnológico de Estudios Superiores de Huixquilucan, Mexico*

\* Corresponding authors:

CJSM: [universidad99@cecad-uabjo.mx](mailto:universidad99@cecad-uabjo.mx)

TI: [tarik.issad@inserm.fr](mailto:tarik.issad@inserm.fr)

CJSM and TI share senior co-authorship

Authors E-mails:

VJC: [jimcv\\_28@hotmail.com](mailto:jimcv_28@hotmail.com)

DIB: [tomy\\_dib@hotmail.com](mailto:tomy_dib@hotmail.com)

EZ: [ezenteno@unam.mx](mailto:ezenteno@unam.mx)

BXAC: [beatrizavilacu@gmail.com](mailto:beatrizavilacu@gmail.com)

MCCP: [cristi\\_ccp@bq.unam.mx](mailto:cristi_ccp@bq.unam.mx)

MRF: [rmartha@unam.mx](mailto:rmartha@unam.mx)

DMM: [danielmontantem@yahoo.com.mx](mailto:danielmontantem@yahoo.com.mx)

EPC: [perezcampos@prodigy.net.mx](mailto:perezcampos@prodigy.net.mx)

ATR: [genyetzin@yahoo.com.mx](mailto:genyetzin@yahoo.com.mx)

AB: [abdelouhab.bouaboud@inserm.fr](mailto:abdelouhab.bouaboud@inserm.fr)

PP: [patrick.pagesy@inserm.fr](mailto:patrick.pagesy@inserm.fr)

## Supplementary figure legends

### Supplementary Figure S1

**O-GlcNAcylation-inducing treatments do not significantly affect IGF-1-induced Erk phosphorylation.** CaSki cells were cultured in presence of 1% FBS, preincubated for 24 h in the absence or presence of TG (10 $\mu$ M for 24h) and GlcN (5 mM for 6h). Cells were then stimulated with IGF-1 (5nM) during 10 min. Erk phosphorylation levels were analysed by western-blotting using the indicated antibodies. Histograms represent the means  $\pm$  SEM of the ratios of P-Erk/Erk signals in 6 independent experiments. Statistical analysis was performed using ANOVA followed by Tukey's post-test. \*, \*\*: p<0.05 and p<0.01, respectively. NS: non-significant.

### Supplementary Figure S2

#### **Separated effects of Thiamet-G and glucosamine in CaSki cells**

**(A)** Effect of Thiamet G alone and glucosamine alone on protein O-GlcNAcylation profile in Caski cells. Cells were cultured in 1% FBS and cultured in the absence or presence of TG (10  $\mu$ M) for 24 h, GlcN (5 mM) for 6 h and/or IGF-1 (5 nM) for 10 min. Cell lysates were collected and analyzed by western blot with anti-O-GlcNAc antibody. Histograms represent the means  $\pm$  SEM of the ratios of O-GlcNAc to GAPDH signals in 2 independent experiments.

**(B)** Effect of Thiamet G alone and glucosamine alone on basal and IGF1-induced PIP<sub>3</sub> production in CaSki cells. CaSki cells were co-transfected with cDNAs coding for the PH domain of Akt fused to a luciferase (Luc-Akt-PH) and a plasma membrane-targeted YFP (YFP-mem). 24h after transfection, cells were cultured in the presence of 1% FBS in the absence or presence of TG (10 $\mu$ M for 24h, upper panel) or GlcN (5 mM for 6h, lower panel). Cells were incubated with coelenterazine for 10 min, and then stimulated with IGF-1 (5nM). Light emission acquisition at 480 nm and 532 nm was started immediately after IGF-1 addition. Results were expressed in milliBRET units (mBU). Left panel: a typical real-time experiment showing the effect of O-GlcNAcylation-inducing treatment on IGF-1-induced PIP<sub>3</sub> production in CaSki cells. Right panel: Results are expressed as the delta BRET (increased BRET above basal) and are the means  $\pm$  SEM of 6 independent experiments.

**(C)** Effect of Thiamet G alone and glucosamine alone on basal and IGF1-induced cell growth. Cells were cultured in 1% FBS and cultured in the absence and presence of TG (10  $\mu$ M, left panel) or GlcN (5 mM, right panel) and/or IGF-1 (5 nM). MTT assay was used to determine the cell growth at 24h and 48h. Results are the mean  $\pm$  SEM of 5 independent experiments.

### **Supplementary Figure S3**

#### **Effect of Thiamet-G and glucosamine on protein N-glycosylation in CaSki cells**

**(A)** CaSki cells were cultured in 1% FBS in the absence and presence of TG (10  $\mu$ M, 24 h) GlcN (5 mM, 6 h) or both. Cell lysates were submitted to SDS-PAGE followed by western-blotting with biotinylated lectins (ConA, PHA-L and WGA). The blots were revealed using ExtrAvidin-Peroxidase. Results are mean  $\pm$  SEM of 3 independent experiments.

**(B)** CaSki cells were cultured in 1% FBS in the absence and presence of TG (10  $\mu$ M, 24 h) GlcN (5 mM, 6 h) or both. Cells were fixed, incubated with biotinylated lectins, washed and incubated with Alexa Fluor-594 streptavidin and then analysed by FACS. Results are the mean  $\pm$  SEM of 2 independent experiments.

### **Supplementary Figure S4**

#### **Effect of O-GlcNAcylation-inducing treatments on IGF1R/PTP1B interaction and on PTP1B O-GlcNAcylation and tyrosine phosphorylation status**

**(A)** Effect of TG+GlcN on basal and IGF1-induced interaction between IGF1R and PTP1B in CaSki cells. CaSki cells were co-transfected with cDNAs coding for IGF1R fused to a luciferase (IGF1R-Luc) and a YFP-tagged substrate-trapping mutant of PTP1B (YFP-PTP1B-D181A). 24h after transfection, cells were cultured in the presence of 1% FBS in the absence or presence of TG (10 $\mu$ M for 24h) and GlcN (5 mM for 6h). Cells were incubated with coelenterazine for 10 min, and then stimulated with IGF-1 (5nM). Light emission acquisition at 480 nm and 532 nm was started immediately after IGF-1 addition. Results were expressed in miliBRET units (mBU). Left panel: a typical real-time experiment showing the effect of treatments on IGF1R/PTP1B interaction in CaSki cells. Right panel: Results are expressed as area under the curve (AUC, mBU.min) and are the means  $\pm$  SEM of 5 independent experiments.

**(B)** CaSki cells were co-transfected with cDNAs coding for IGF1R and a YFP-tagged substrate-trapping mutant of PTP1B (YFP-PTP1B-D181A). 24h after transfection, cells were cultured in the presence of 1% FBS in the absence or presence of TG (10 $\mu$ M for 24h) and GlcN (5 mM for 6h). Cells were stimulated with 5nM IGF1 for 10 min and then lysed at 4°C in buffer containing protease, tyrosine-phosphatase and O-GlcNAcase inhibitors as described in the method section. YFP-PTP1B was then immunoprecipitated using anti-GFP antibody (Roche), submitted to western-blotting and revealed with either anti-OGlcNAc antibody (RL2). Blots were then reprobated with anti-PTP1B antibody. PTP1B does not appear to be O-GlcNAcyated upon treatment with TG+GlcN, whereas a marked increase in protein O-GlcNAcylation was observed

in total cell lysates under these conditions. Immunoblots are representative of 4 independent experiments.

**(C)** YFP-PTP1B was immunoprecipitated using anti-GFP antibody, submitted to western-blotting and revealed with anti-phosphotyrosine antibody (4G10). Blots were then reprobbed with anti-PTP1B antibody. Immunoblots are representative of 4 independent experiments. Histograms represent the means  $\pm$  SEM of the ratios of pY-PTP1B to total PTP1B signals in 4 independent experiments.

# Supplementary Figure S1

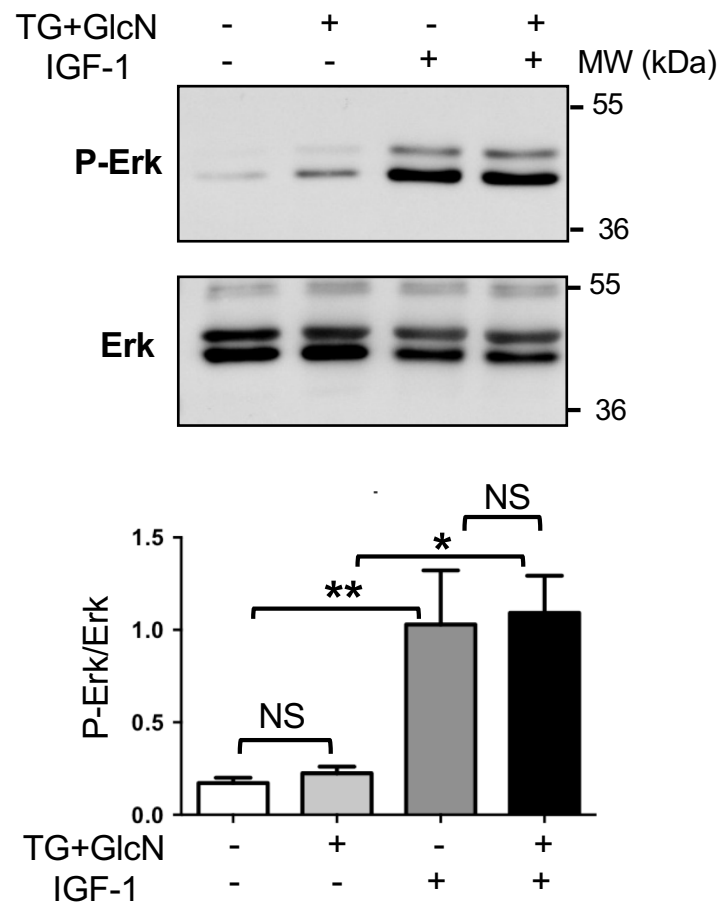

# Supplementary Figure S2

**A**

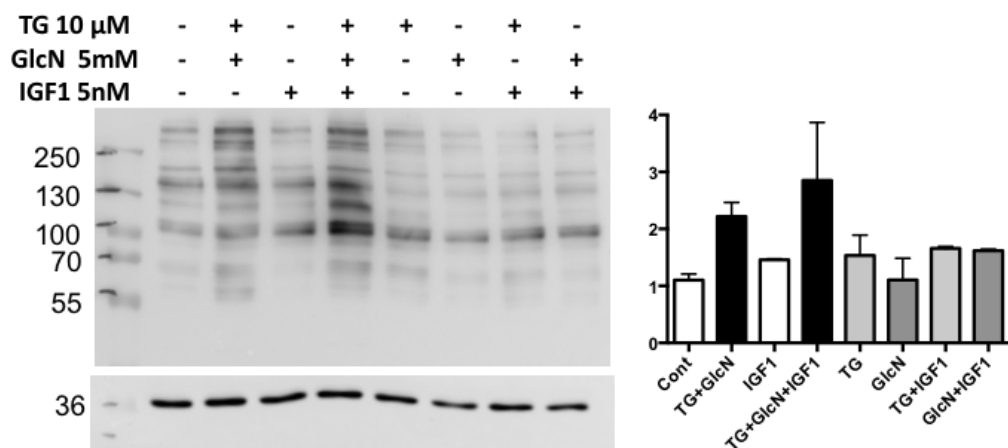

**B**

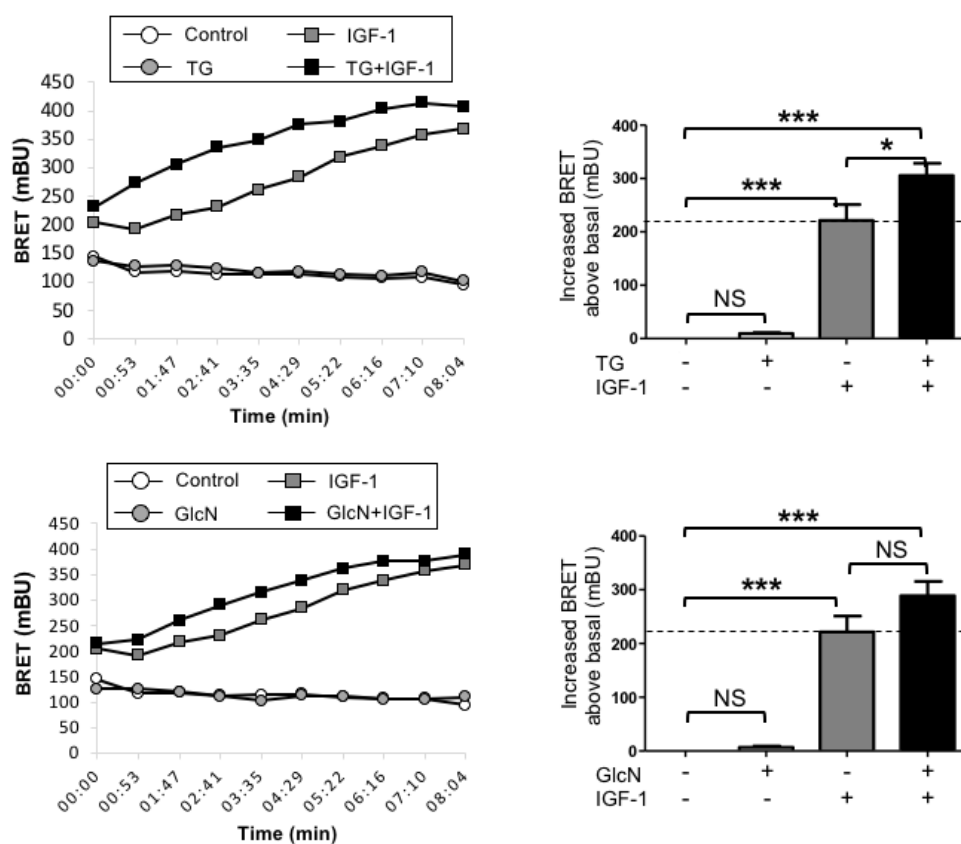

**C**

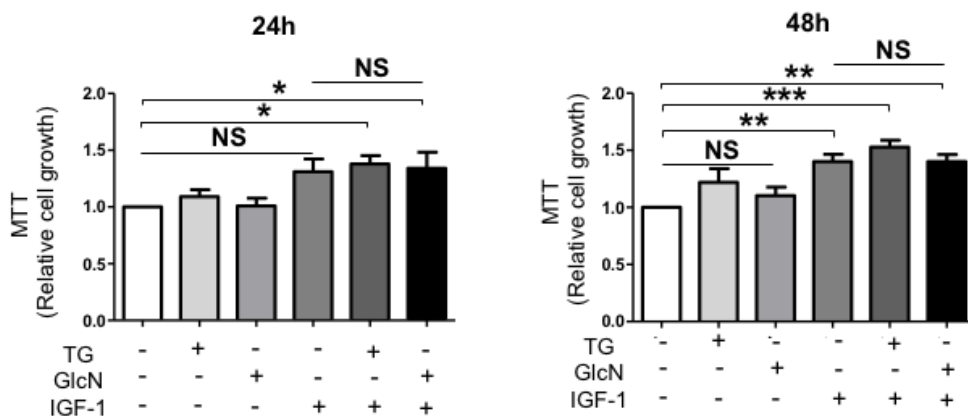

# Supplementary Figure S3

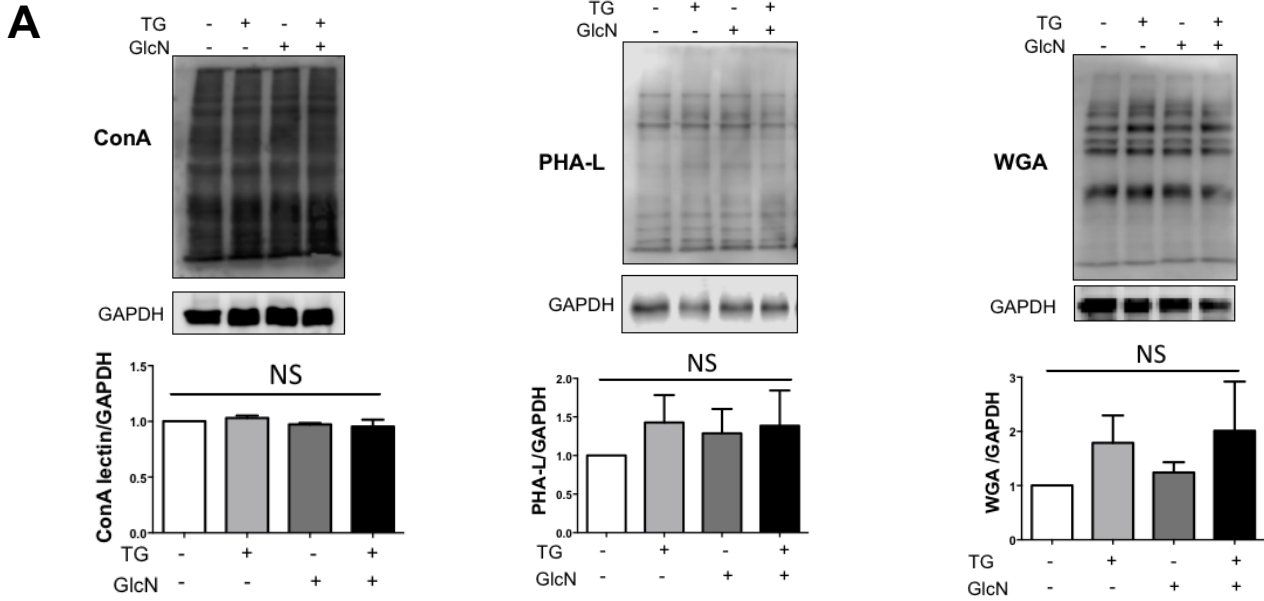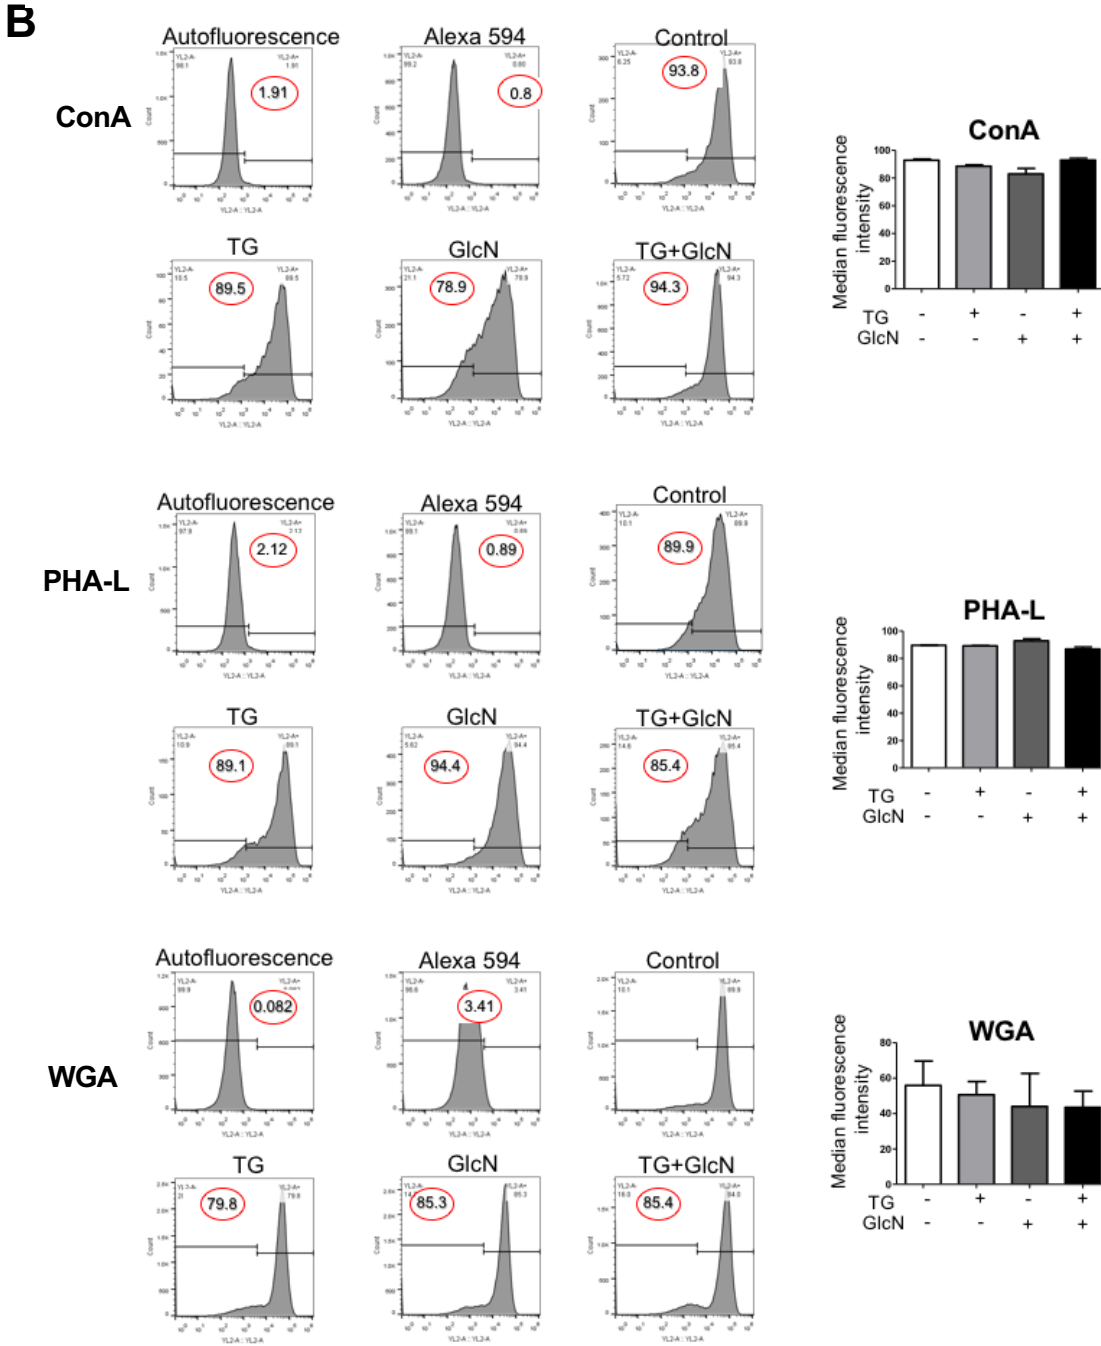

# Supplementary Figure S4

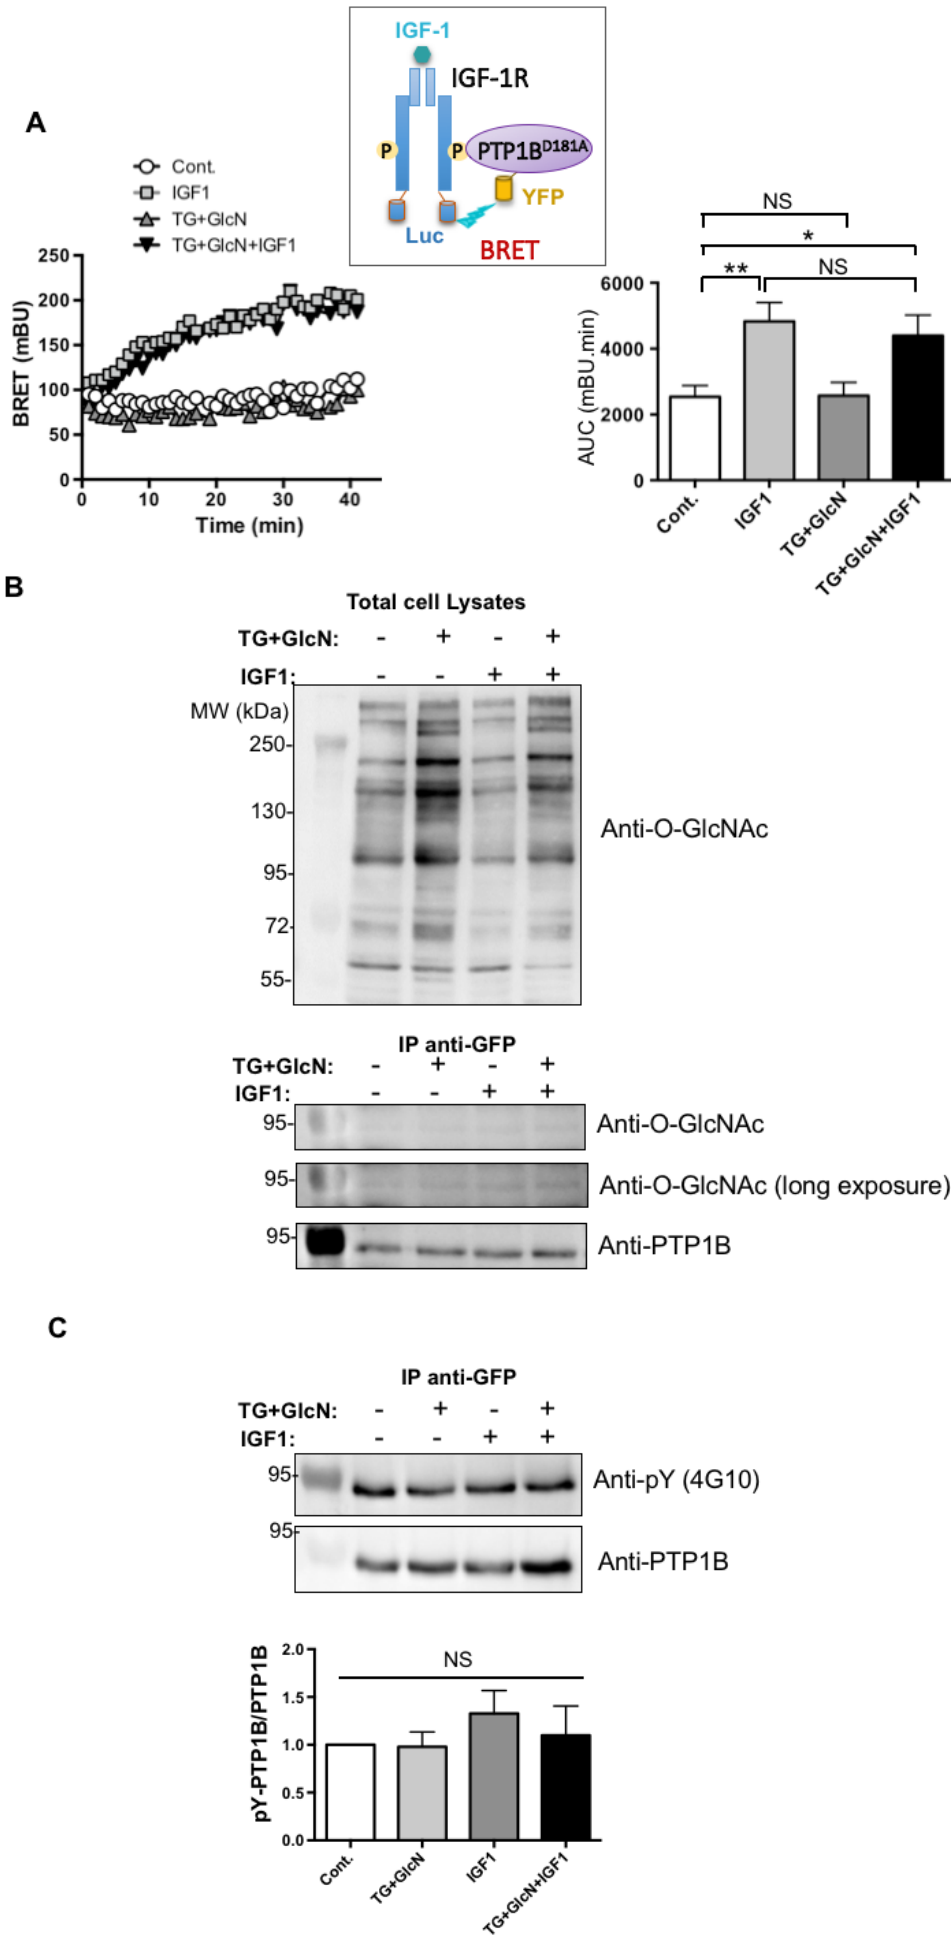

Supplement: 41598_2022_8445_MOESM1_ESM.pdf [file 41598_2022_8445_MOESM1_ESM.pdf]
